# Supplementary material for: Chickpea transcription factor CaTLP1 interacts with protein kinases, modulates ROS accumulation and promotes ABA-mediated stomatal closure
Source: PubMed Central journal article supplement (PMC5146945; doi:10.1038/srep38121), 2016-12-09
Supplement: srep38121-s1.pdf [file srep38121-s1.pdf]

**Chickpea transcription factor CaTLP1 interacts with protein kinases, modulates ROS accumulation and promotes ABA-mediated stomatal closure**

Vijay Wardhan, Aarti Pandey, Subhra Chakraborty and Niranjana Chakraborty§

National Institute of Plant Genome Research, Jawaharlal Nehru University Campus, Aruna Asaf Ali Marg, New Delhi-110067, India.

**Running title:** *CaTLP1 promotes ABA-mediated stomatal closure*

**Corresponding author**

\*Dr. Niranjana Chakraborty

National Institute for Plant Genome Research

Jawaharlal Nehru University Campus

Aruna Asaf Ali Marg, New Delhi-110067, India.

E-mail: [nchakraborty@nipgr.ac.in](mailto:nchakraborty@nipgr.ac.in)

**Tel:** 00-91-11-26735178

**Fax:** 00-91-11-26741658

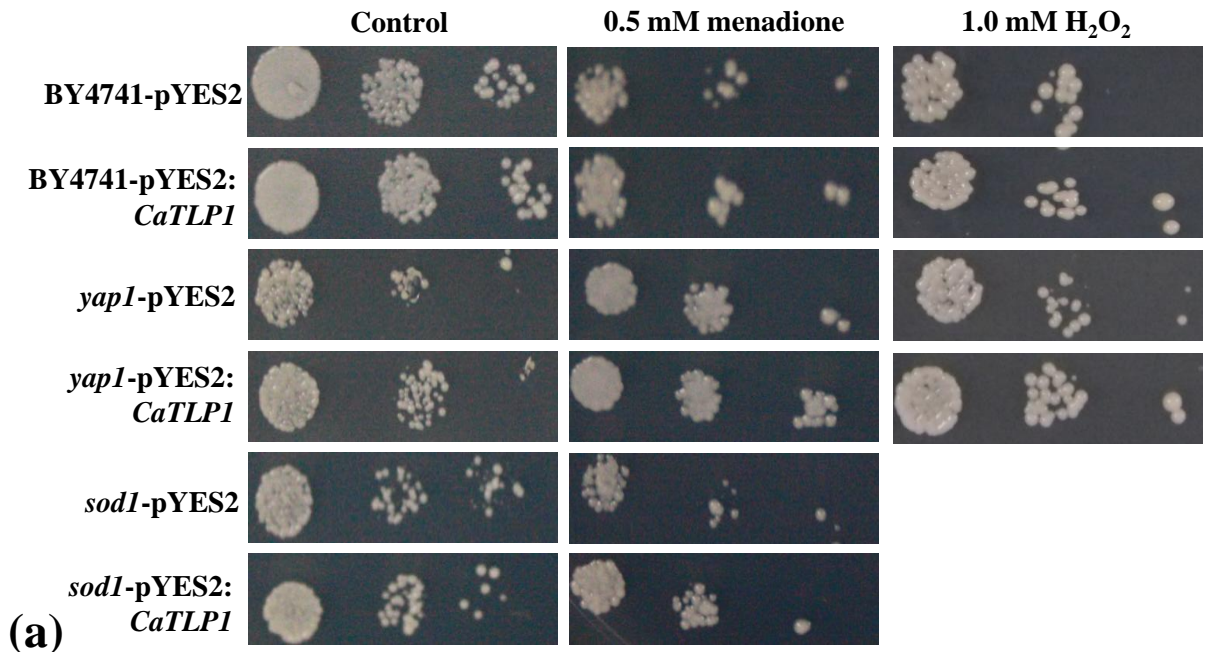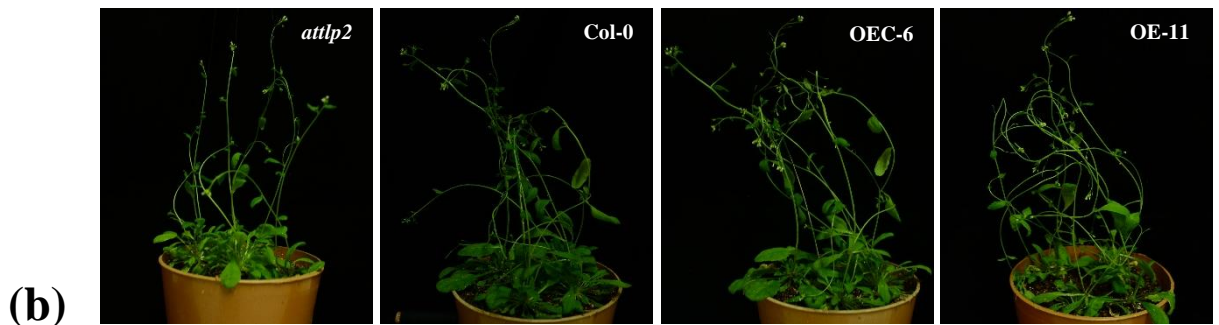

**Supplemental Figure 1:** (a) Growth phenotype of yeast strains subjected to 0.5 mM menadione and 1.0 mM H<sub>2</sub>O<sub>2</sub>. Growth was monitored by optical density at 600 nm and cells were taken as 1:10 serial dilution. (b) Growth phenotype of Arabidopsis plants *attlp2*, wild-type (Col0), complemented (OEC-6) and overexpressed (OE-11) in unstressed condition.

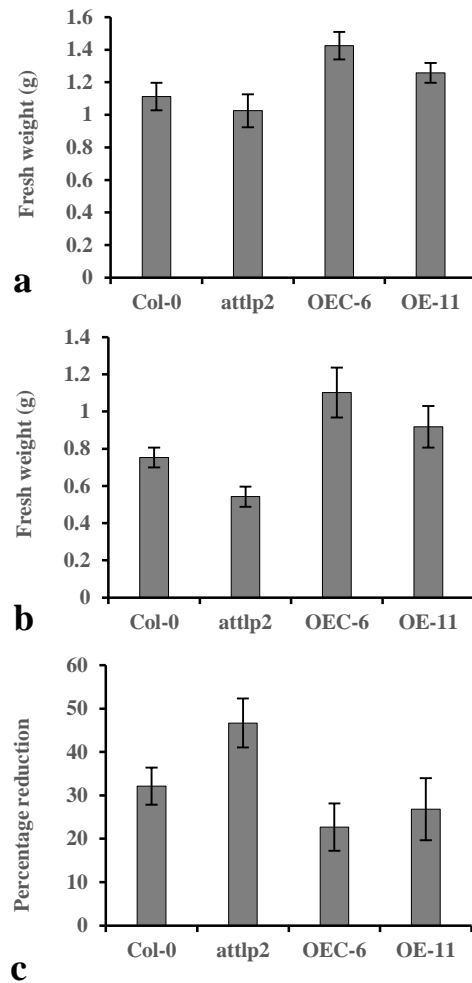

**Supplemental Figure 2.** Effect of dehydration on growth and development of *Arabidopsis* plants. Biomass accumulation (FW) in six weeks old WT (Col0), mutant (*attlp2*) and transgenic (OEC-6 and OE-11) *Arabidopsis* grown under (a) unstressed condition and (b) under dehydration. (c) Percentage reduction in biomass in response to dehydration stress. The seedlings were grown for three weeks before subjecting them to dehydration. The values under fresh weight represent mean of at least twelve individual plants of each line and error bar represents standard error based on three experiments ( $p = 0.01$ ).

**Supplemental Table 1.** Biomass [FW (in g)] of Arabidopsis seedlings under dehydration.

| Lines  | Unstressed                    | Stressed                     |
|--------|-------------------------------|------------------------------|
| Col0   | 1.1125±0.08421 <sup>a,b</sup> | 0.7525±.05315 <sup>b</sup>   |
| attlp2 | 1.0250±0.10083 <sup>a</sup>   | 0.5425±.05377 <sup>a</sup>   |
| OEC-6  | 1.4250±0.08544 <sup>c</sup>   | 1.1025±.13401 <sup>c</sup>   |
| OE-11  | 1.2575±0.06076 <sup>b,c</sup> | 0.9175±.11177 <sup>b,c</sup> |

The superscript letters indicate significantly different at  $p < 0.05$ , as measured by 2-sided Tukey's HSD between the indicated lines. Values represented as mean  $\pm$  SD.

**Supplemental Table 2.** List of *cis*-regulatory elements present in the proximal promoter region of chickpea TLPs.

I. PLACE database result of ~1.4 kb promoter fragment of each *TLP* is provided.

| <i>cis</i> -elements | CaTLP1 | CaTLP2 | CaTLP3 |
|----------------------|--------|--------|--------|
| -10PEHVPSBD          | 1      | 2      | 1      |
| -300CORE             | 1      | 0      | 1      |
| -300ELEMENT          | 2      | 3      | 2      |
| AACACOREOSGLUB1      | 1      | 0      | 1      |
| ABRE3HVA1            | 0      | 1      | 0      |
| ABRELATERD1          | 1      | 3      | 2      |
| ABRERATCAL           | 0      | 1      | 1      |
| ACGTABREMOTIFA2OSEM  | 1      | 1      | 1      |
| ACGTATERD1           | 2      | 8      | 4      |
| AGMOTIFNTMYB2        | 1      | 1      | 1      |
| AMYBOX1              | 3      | 2      | 2      |
| ANAERO1CONSENSUS     | 1      | 3      | 1      |
| ANAERO2CONSENSUS     | 1      | 0      | 1      |
| ANAERO3CONSENSUS     | 0      | 1      | 0      |
| ANAERO5CONSENSUS     | 0      | 0      | 1      |
| ARFAT                | 2      | 0      | 2      |
| ARR1AT               | 23     | 30     | 16     |
| BIHD1OS              | 1      | 4      | 2      |
| BOXIINTPATPB         | 1      | 1      | 1      |
| BOXIIPCCHS           | 1      | 0      | 1      |
| BP5OSWX              | 0      | 2      | 1      |
| BS1EGCCR             | 0      | 0      | 1      |
| CAATBOX1             | 17     | 22     | 18     |
| CACTFTPPCA1          | 21     | 14     | 20     |
| CANBNNAPA            | 0      | 1      | 0      |
| CAREOSREP1           | 1      | 2      | 1      |
| CARGCW8GAT           | 0      | 2      | 0      |
| CBFHV                | 0      | 0      | 2      |
| CCA1ATLHCB1          | 0      | 1      | 0      |
| CCAATBOX1            | 3      | 4      | 5      |
| CGCGBOXAT            | 0      | 0      | 4      |
| CIACADIANLELHC       | 2      | 1      | 2      |
| CPBCSPOR             | 2      | 4      | 1      |
| CURECORECR           | 2      | 6      | 2      |
| DOFCOREZM            | 19     | 23     | 18     |
| DPBFCOREDCDC3        | 0      | 2      | 0      |
| DRE2COREZMRAB17      | 0      | 0      | 2      |
| DRECRTCOREAT         | 0      | 0      | 2      |
| E2FCONSENSUS         | 0      | 1      | 0      |
| EBOXBNNAPA           | 8      | 6      | 8      |

|                       |    |    |    |
|-----------------------|----|----|----|
| EECCRCAH1             | 1  | 4  | 5  |
| ELRECOREPCR1          | 0  | 0  | 1  |
| EMHVCHORD             | 1  | 0  | 1  |
| ERELEE4               | 2  | 1  | 0  |
| GADOWNAT              | 0  | 1  | 0  |
| GARE1OSREP1           | 1  | 0  | 1  |
| GAREAT                | 2  | 2  | 1  |
| GATABOX               | 6  | 12 | 7  |
| GT1CONSENSUS          | 10 | 12 | 15 |
| GT1CORE               | 2  | 1  | 2  |
| GT1GMSAM4             | 4  | 4  | 5  |
| GTGANTG10             | 10 | 9  | 13 |
| HDZIP2ATATHB2         | 1  | 0  | 1  |
| IBOXCORE              | 1  | 3  | 2  |
| INRNTPSADB            | 6  | 5  | 6  |
| LECPLEACS2            | 1  | 0  | 0  |
| LTRE1HVBLT49          | 1  | 0  | 1  |
| LTREATLTI78           | 0  | 0  | 1  |
| LTRECOREATCOR15       | 0  | 0  | 2  |
| MARTBOX               | 3  | 4  | 3  |
| MYB1AT                | 2  | 2  | 2  |
| MYB1LEPR              | 1  | 0  | 1  |
| MYB2CONSENSUSAT       | 2  | 0  | 1  |
| MYBCORE               | 5  | 0  | 7  |
| MYBCOREATCYCB1        | 3  | 1  | 2  |
| MYBGAHV               | 2  | 2  | 1  |
| MYBPLANT              | 1  | 0  | 2  |
| MYBPZM                | 1  | 0  | 1  |
| MYBST1                | 1  | 2  | 1  |
| MYCATERD1             | 2  | 2  | 1  |
| MYCATRD22             | 2  | 2  | 1  |
| MYCCONSENSUSAT        | 8  | 6  | 8  |
| NAPINMOTIFBN          | 0  | 1  | 0  |
| NODCON1GM             | 0  | 1  | 0  |
| NODCON2GM             | 4  | 3  | 4  |
| NTBBF1ARROLB          | 2  | 2  | 3  |
| OSE1ROOTNODULE        | 0  | 1  | 0  |
| OSE2ROOTNODULE        | 4  | 3  | 4  |
| POLASIG1              | 12 | 12 | 12 |
| POLASIG2              | 6  | 2  | 3  |
| POLASIG3              | 8  | 5  | 8  |
| POLLEN1LELAT52        | 7  | 10 | 6  |
| PREATPRODH            | 2  | 0  | 1  |
| PRECONSCRHSP70A       | 0  | 1  | 0  |
| PROLAMINBOXOSGLUB1    | 0  | 1  | 0  |
| PYRIMIDINEBOXOSRAMY1A | 0  | 3  | 0  |

|                      |    |    |    |
|----------------------|----|----|----|
| QARBNEXTA            | 0  | 1  | 0  |
| RAV1AAT              | 7  | 4  | 9  |
| RAV1BAT              | 0  | 0  | 1  |
| RBCSCONSENSUS        | 1  | 1  | 2  |
| REALPHALGLHCB21      | 2  | 4  | 2  |
| RHERPATEXPA7         | 0  | 3  | 1  |
| ROOTMOTIFTAPOX1      | 11 | 12 | 1  |
| RYREPEATBNNAPA       | 1  | 1  | 1  |
| RYREPEATLEGUMINBOX   | 0  | 1  | 0  |
| S1FBOXSORPS1L21      | 1  | 2  | 1  |
| SEBFCONSSTPR10A      | 1  | 0  | 2  |
| SEF3MOTIFGM          | 1  | 1  | 1  |
| SEF4MOTIFGM7S        | 7  | 7  | 4  |
| SITEIIATCYTC         | 1  | 0  | 1  |
| SORLIP1AT            | 3  | 0  | 2  |
| SORLIP2AT            | 3  | 0  | 2  |
| SORLIP5AT            | 0  | 0  | 1  |
| SP8BFIBSP8BIB        | 1  | 0  | 0  |
| SREATMSD             | 0  | 1  | 0  |
| SURECOREATSULTR11    | 3  | 1  | 2  |
| SV40COREENHAN        | 0  | 1  | 0  |
| T/GBOXATPIN2         | 0  | 2  | 1  |
| TAAAGSTKST1          | 6  | 3  | 6  |
| TATABOX2             | 0  | 1  | 0  |
| TATABOX3             | 1  | 0  | 0  |
| TATABOX4             | 1  | 2  | 0  |
| TATABOX5             | 12 | 8  | 10 |
| TATAPVTRNALEU        | 0  | 1  | 0  |
| TATCCACHVAL21        | 0  | 1  | 0  |
| TATCCAOSAMY          | 1  | 1  | 1  |
| TATCCAYMOTIFOSRAMY3D | 0  | 1  | 0  |
| TBOXATGAPB           | 0  | 1  | 1  |
| TCA1MOTIF            | 0  | 1  | 0  |
| WBBBOXPCWRKY1        | 0  | 0  | 1  |
| WBOXATNPR1           | 1  | 3  | 2  |
| WBOXHVISO1           | 2  | 1  | 3  |
| WBOXNTCHN48          | 1  | 0  | 1  |
| WBOXNTERF3           | 3  | 2  | 6  |
| WRKY71OS             | 4  | 6  | 8  |

II. PLANTCARE database result of ~1.4 kb promoter fragment of chickpea TLPs.

| <i>cis</i> -elements | CaTLP1 | CaTLP2 | CaTLP3 |
|----------------------|--------|--------|--------|
| AAGAA-motif          | √      | √      | √      |
| ABRE                 | √      | √      | x      |
| AE-box               | √      | x      | √      |

|                 |   |   |   |
|-----------------|---|---|---|
| ARE             | √ | √ | √ |
| ATCT-motif      | √ | √ | x |
| Box 4           | √ | √ | √ |
| Box I           | √ | √ | x |
| CAAT-box        | √ | √ | √ |
| CAT-box         | √ | x | x |
| CATT-motif      | √ | √ | √ |
| EIRE            | √ | x | √ |
| ERE             | √ | x | x |
| F-box           | √ | x | x |
| G-box           | √ | √ | √ |
| GATA-motif      | √ | x | x |
| GCN4_motif      | √ | √ | √ |
| GT1-motif       | √ | √ | √ |
| LTR             | √ | x | √ |
| O2-site         | √ | x | √ |
| Skn-1_motif     | √ | √ | x |
| TATA-box        | √ | √ | √ |
| TC-rich repeats | √ | √ | √ |
| TCA-element     | √ | x | √ |
| TCT-motif       | √ | x | √ |
| Unnamed__1      | √ | x | x |
| Unnamed__3      | √ | x | x |
| Unnamed__4      | √ | √ | √ |
| chs•CMA1a       | √ | x | x |
| circadian       | √ | √ | x |
| AAAC-motif      | x | √ | x |
| ACE             | x | √ | x |
| GAG-motif       | x | √ | √ |
| GARE-motif      | x | √ | x |
| I-box           | x | √ | x |
| MRE             | x | √ | √ |
| P-box           | x | √ | x |
| TCCC-motif      | x | √ | x |
| as-2-box        | x | √ | x |
| Box-W1          | x | x | √ |
| MBS             | x | x | √ |
| Sp1             | x | x | √ |
| W box           | x | x | √ |
| WUN             | x | x | √ |



**Supplemental Table 3.** Analysis of promoter of CaTLP1 homologs. ABRE consensus sequence ACACGTGNC is shown for representative plant species.

| Plant species                   | Motif      |
|---------------------------------|------------|
| <i>Glycine max</i>              | CACGT      |
| <i>Arabidopsis lyrata</i>       | ACGTG      |
| <i>Arabidopsis thaliana</i>     | ACGTG      |
| <i>Populus trichocarpa</i>      | ACGTG      |
| <i>Ricinus communis</i>         | CACGTC     |
| <i>Cicer arietinum (CaTLP1)</i> | CCACGTC    |
| <i>Cicer arietinum (CaTLP2)</i> | GCAACGTGTC |
| <i>Sorghum bicolor</i>          | CACGT      |
| <i>Vitis vinifera</i>           | CACGT      |
| <i>Physcomitrella patens</i>    | CACGT      |

**Supplemental Table 4.** CaTLP1 interacting proteins identified from immunoprecipitated complexes.

| <b>Accession No.</b> | <b>Protein Name</b>                                                                       |
|----------------------|-------------------------------------------------------------------------------------------|
| gi 15218569          | CK2; casein kinase I/ kinase [ <i>Arabidopsis thaliana</i> ]                              |
| gi 15224781          | CKL5 (Casein Kinase I-like 5); casein kinase I/ kinase [ <i>A. thaliana</i> ]             |
| gi 15236114          | CK1 (casein kinase 1-like protein 1); casein kinase I/ kinase [ <i>A. thaliana</i> ]      |
| gi 52077492          | putative protein kinase ADK1 [ <i>Oryza sativa japonica</i> ] / predicted casein kinase I |
| gi 224116874         | predicted protein [ <i>Populus trichocarpa</i> ]                                          |
| gi 147859066         | hypothetical protein [ <i>Vitis vinifera</i> ]                                            |
| gi 168044758         | predicted protein [ <i>Physcomitrella patens</i> subsp. <i>patens</i> ]                   |
| gi 223973105         | unknown protein [ <i>Zea mays</i> ]                                                       |
| gi 224091248         | predicted protein [ <i>Populus trichocarpa</i> ]                                          |
| gi 225442217         | predicted hypothetical protein [ <i>Vitis vinifera</i> ]                                  |

**Supplemental Table 5.** List of primers used in this study.

| <b>Primer Name</b>      | <b>Primer Sequences (5'- 3')</b> |
|-------------------------|----------------------------------|
| TubGSP1                 | ACCACCCCGCTTCGATTTACTACCTATT     |
| TubGSP2                 | CACGGACTATGTTTTTCAATGGCAT        |
| TubBaMF                 | CGCGGATCCATGCCATTGAAAAACATAG     |
| TubSaLR                 | ACGAGTCGACTCACAGGCTGGTTTAG       |
| TUBBaM22F               | CGCGGATCCGATGCCATTGAAAAACAT      |
| TUBSaL22R               | ACGCGTCGACTTCACAGGCTGGTTTA       |
| CaTLP1GATEWAYCF         | CACCATGCCATTGAAAAACATAGTCCGT     |
| CaTLP1GATEWAYCR         | CACAGGCTGGTTTAGTATCAAAGCTT       |
| CaTLP1GATEWAYPF         | CACCCTATGGTGTATATAAGTGG          |
| CaTLP1GATEWAYPR         | GTTTCCACACCTTACAAACTCC           |
| AtTLP2RT-F              | GAGAGAGGTTTCAGGTTTCGTTTTG        |
| AtTLP2RT-R              | CGCCGATCTCACCGTAGGT              |
| CaTLP1RTF               | GAGGAAGGAGGAAATGCTCCA            |
| CaTLP1RTR               | GTGAGGGAGAAAAAGGTTTCGTC          |
| RTPOLYUBIFP             | TGCCGACTACAACATCCAGAAG           |
| RTPOLYUBIRP             | TGCATGCCTCCACGAAGAC              |
| RTGROELFP               | CGGTAAATCCGTCGCTCGTA             |
| RTGROELRP               | TCACCGTCGGGACTCTGAAG             |
| M13FP                   | GTTTTCCCAGTCACGACGTTG            |
| M13RP                   | TGAGCGGATAACAATTTACACAG          |
| M13F                    | CGCCAGGGTTTTCCCAGTCACGAC         |
| M13R                    | AGCGGATAACAATTTACACAGGA          |
| GUS584F                 | AAGACTGTAACCACGCGTCTG            |
| GUS626R                 | GTTCAACGCTGACATCACCA             |
| RAB18-5L                | TCGGTCGTTGTATTGTGCTTTTT          |
| RAB18-7R                | CCAGATGCTCATTACACACTCATG         |
| RD20-REALF2             | TTAGCTCCGGTCACCAGTCA             |
| RD20-REALR2             | CATGTATGGTTTTGGTAATGTTTCC        |
| AtTLP2FP                | ATGTCTTTGAAAAGCATCCTTCGTG        |
| AtTLP2RP                | TTACCCCTCACATGCCGGTTT            |
| CaTDNALPEF              | GGATAGGTCTGGTTTTCTGGG            |
| CaTDNARPER              | ATGATTGCCTTTGCATGACTC            |
| CaTDNALPP1F             | CCTTGTGATTGCGAATTTTTTC           |
| CaTDNARPP1P2R           | AAGATCGGAAAGAGAAACGC             |
| CaTDNALPP2F             | ATATGCTTTCAAACCCCAAC             |
| EF-1 $\alpha$ -qPCR-for | CTTGCTTTCACCCTTGGTGT             |
| EF-1 $\alpha$ -qPCR-rev | TCCCTCGAATCCAGAGATTG             |
| CaCK1PENTRF             | CACCATGGAACCTCGTGTTGGAAATAAG     |
| CaCK1R                  | ATAATGGGTCTCTCATCAGTCTCTAACTG    |
